# Supplementary material for: One-pot hydrothermal synthesis of noble-metal-free NiS on Zn0.5Cd0.5S nanosheet photocatalysts for high H2 evolution from water under visible light
Source: Royal Society of Chemistry journal article supplement (doi:10.1039/d3dt03765g), 2024-01-01
Supplement: d3dt03765g1.pdf [file d3dt03765g1.pdf]

## One-pot hydrothermal synthesis of noble-metal-free NiS on Zn<sub>0.5</sub>Cd<sub>0.5</sub>S nanosheets photocatalysts for high H<sub>2</sub> evolution from water under visible light.

Linfen Yang <sup>a, b</sup>, Yong Peng <sup>a, b\*</sup> and Yuhua Wang <sup>c\*</sup>

<sup>a</sup> Department of Materials Science, School of Physical Science and Technology, Lanzhou University, Lanzhou, 730000, China

<sup>b</sup> School of Materials and Energy, or Electron Microscopy Centre of Lanzhou University, Lanzhou, 730000, China

<sup>c</sup> School of Materials and Energy, Lanzhou University, Lanzhou, 730000, China

\*Corresponding author: Prof. Yong Peng, or Prof. Yuhua Wang.

Tel: +86-931-8912772; Fax: +86-931-8913554

E-mail address: pengy@lzu.edu.cn, or wyh@lzu.edu.cn

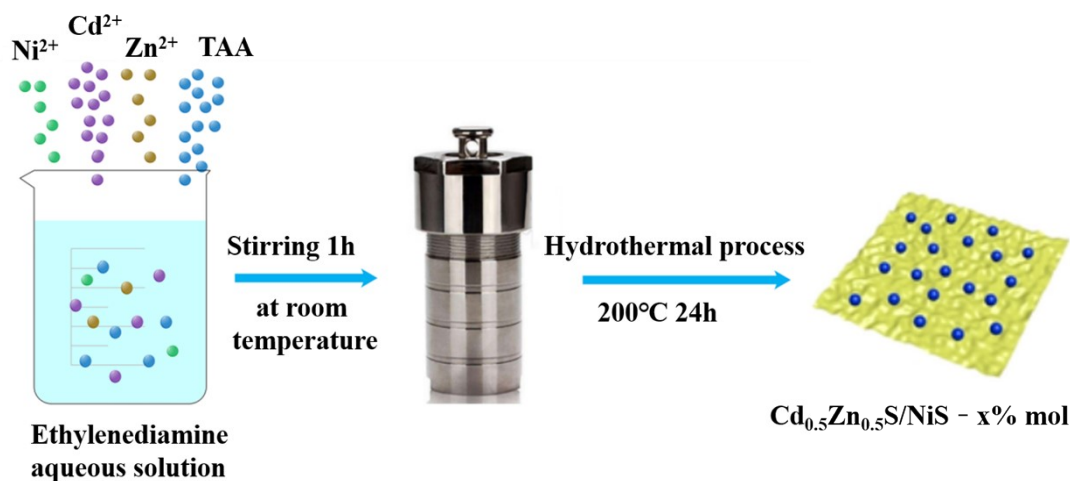

Fig. S1. Schematic illustration of the fabrication process of ZCS/NS.

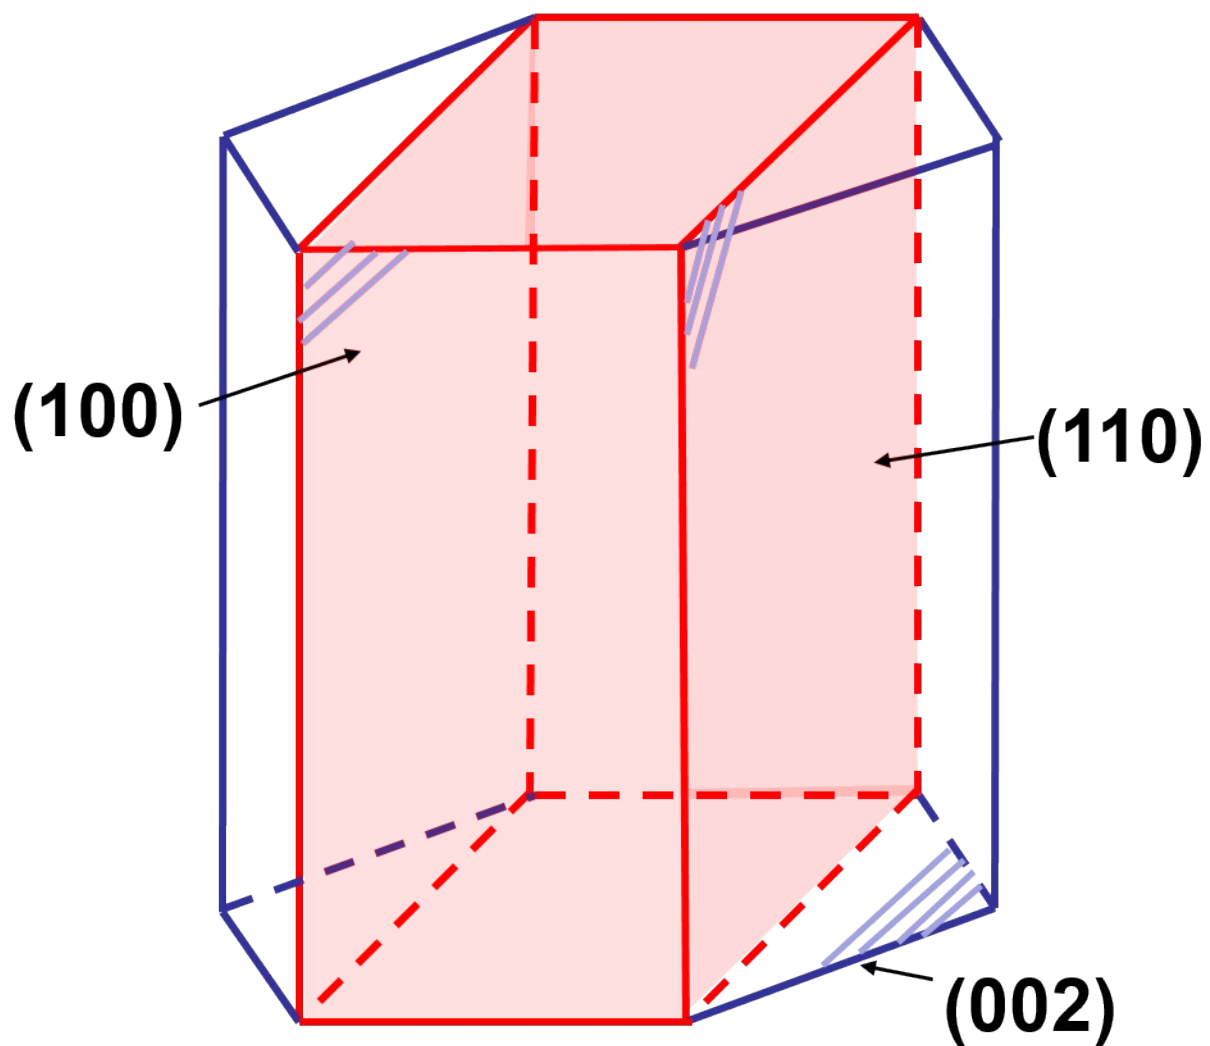

**Fig. S2.** Schematic diagram of formation of nanosheets in hexagonal crystal system.

**Table S1.** The relative intensity of different crystal faces in  $\text{Zn}_{0.5}\text{Cd}_{0.5}\text{S}$  sample and its PDF card

| Crystal faces                                                  | (100) | (002) | (101) |
|----------------------------------------------------------------|-------|-------|-------|
| Relative intensity of PDF card                                 | 78.5  | 51.4  | 100   |
| Relative intensity of $\text{Zn}_{0.5}\text{Cd}_{0.5}\text{S}$ | 73    | 144   | 85    |

**Table S2.** The relative intensity ratios of (101)/(100), (101)/(002) and (101)/(101) in Zn<sub>0.5</sub>Cd<sub>0.5</sub>S sample and its PDF card

| <b>Crystal plane</b>                                                  | <b>(100)</b> | <b>(002)</b> | <b>(101)</b> |
|-----------------------------------------------------------------------|--------------|--------------|--------------|
| <b>Relative intensity ratios of PDF card</b>                          | 0.785        | 0.514        | 1            |
| <b>Relative intensity of ratios Zn<sub>0.5</sub>Cd<sub>0.5</sub>S</b> | 0.86         | 1.694        | 1            |

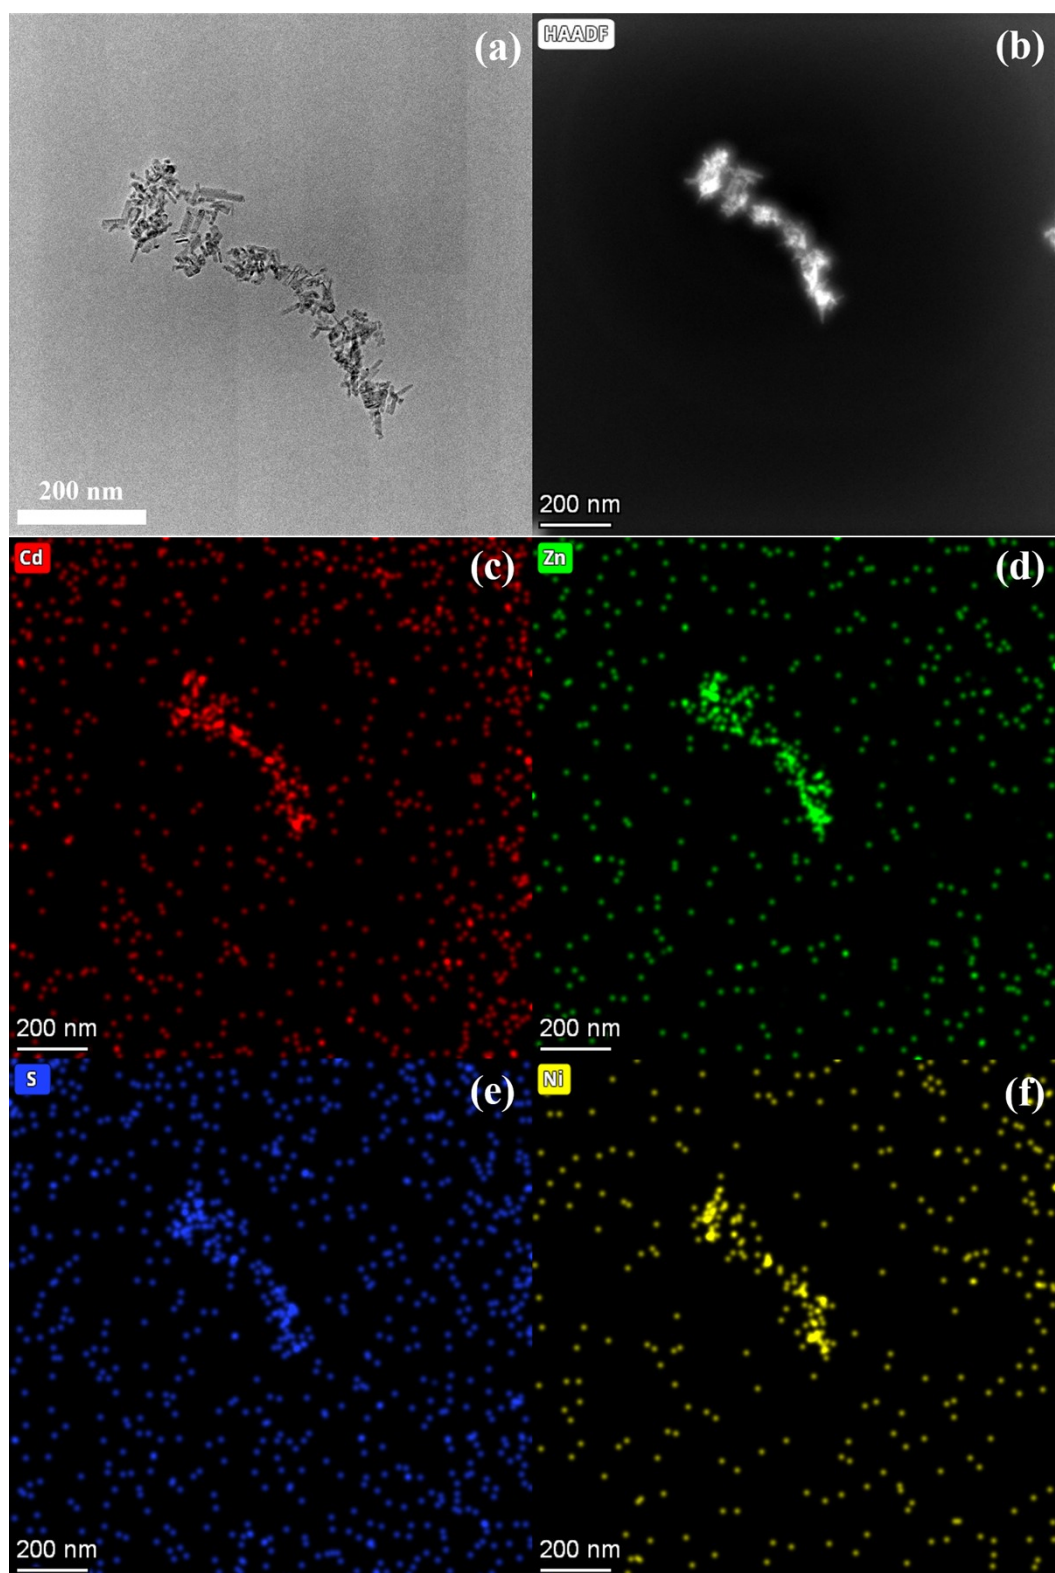

**Fig. S3.** (a) TEM image of ZCS-NS-5 composites. (b-f) High-angle annular dark-field scanning transmission electron microscopy (HAADF-STEM) image and the elemental mappings of ZCS-NS-5

composites.

**Table S3.** The measured ICP concentration and the calculated mass and molar ratio of metal ions contained in ZCS/NS-5.

| Metal ion | C1(mg/L) | C2(mg/L) | m(mg) | n(Mmol) | Practical Ni/(Cd+Mn)<br>molar ratio |
|-----------|----------|----------|-------|---------|-------------------------------------|
| Zn        | 52.75    | 51.76    | 2.77  | 0.042   | <b>4.86%</b>                        |
| Cd        | 88.72    | 89.36    | 4.72  | 0.0424  |                                     |
| Ni        | 4.631    | 4.417    | 0.24  | 0.0041  |                                     |

**Table S4** Performance comparison of typical sulfide based photocatalysts.

| Photocatalyst                                                | Light source                         | Sacrificial reagent                               | Catalyst dosage (mg) | morphology    | H <sub>2</sub> evolution (mmol g <sup>-1</sup> h <sup>-1</sup> ) | Ref. |
|--------------------------------------------------------------|--------------------------------------|---------------------------------------------------|----------------------|---------------|------------------------------------------------------------------|------|
| MS/Cd <sub>0.4</sub> Zn <sub>0.4</sub> S(M = Mo, Cu, Pd)     | 300 W Xe lamp (λ≥420 nm)             | Na <sub>2</sub> S-Na <sub>2</sub> SO <sub>3</sub> | 50                   | nanoparticles | 1.2                                                              | S1   |
| 1wt%Pt/ Cd <sub>0.4</sub> Zn <sub>0.4</sub> S                | 300 W Xe lamp (λ≥400 nm)             | Na <sub>2</sub> S-Na <sub>2</sub> SO <sub>3</sub> | 50                   | nanoparticles | 1.21                                                             | S1   |
| Cd <sub>0.2</sub> Zn <sub>0.8</sub> S@UiO-66-NH <sub>2</sub> | 300 W Xe lamp (λ≥400 nm)             | Na <sub>2</sub> S-Na <sub>2</sub> SO <sub>3</sub> | 50                   | nanoparticles | 5.85                                                             | S2   |
| Cu <sub>2</sub> S/Zn <sub>0.5</sub> Cd <sub>0.5</sub> S      | 300 W Xe lamp (λ≥400 nm)             | Na <sub>2</sub> S-Na <sub>2</sub> SO <sub>3</sub> | 100                  | nanoparticles | 4.92                                                             | S3   |
| CuS/Cd <sub>0.3</sub> Zn <sub>0.7</sub> S                    | high-pressure mercury lamp(λ≥420 nm) | Na <sub>2</sub> S-Na <sub>2</sub> SO <sub>3</sub> | 50                   | nanoparticles | 3.52                                                             | S4   |
| p-Cu <sub>2</sub> S/n-Zn <sub>x</sub> Cd <sub>1-x</sub> S    | solar simulator                      | Na <sub>2</sub> S-Na <sub>2</sub> SO <sub>3</sub> | 50                   | nanoparticles | 0.87                                                             | S5   |

| Photocatalyst                                                                            | Light source                         | Sacrificial reagent                               | Catalyst dosage (mg) | morphology    | H <sub>2</sub> evolution (mmol g <sup>-1</sup> h <sup>-1</sup> ) | Ref. |
|------------------------------------------------------------------------------------------|--------------------------------------|---------------------------------------------------|----------------------|---------------|------------------------------------------------------------------|------|
| Cu <sub>2</sub> (OH) <sub>2</sub> CO <sub>3</sub> /Zn <sub>0.5</sub> Cd <sub>0.5</sub> S | 300 W Xe lamp (λ≥420 nm)             | Na <sub>2</sub> S-Na <sub>2</sub> SO <sub>3</sub> | 50                   | nanoparticles | 5.51                                                             | S6   |
| CuS/Zn <sub>0.8</sub> Cd <sub>0.2</sub> S                                                | 300 W Xe lamp(λ≥400nm)               | Na <sub>2</sub> S-Na <sub>2</sub> SO <sub>3</sub> | 200                  | nanoparticles | 2.79                                                             | S7   |
| MoS <sub>2</sub> /Zn <sub>0.5</sub> Cd <sub>0.5</sub> S/g-C <sub>3</sub> N <sub>4</sub>  | 300 W Xe lamp (λ≥400 nm)             | Na <sub>2</sub> S-Na <sub>2</sub> SO <sub>3</sub> | 100                  | particles     | 4.91                                                             | S8   |
| CoFe <sub>2</sub> O <sub>4</sub> /Cd <sub>0.9</sub> Zn <sub>0.1</sub> S                  | 300 W Xe lamp (λ≥400 nm)             | Na <sub>2</sub> S-Na <sub>2</sub> SO <sub>3</sub> | 100                  | nanorods      | 3.5                                                              | S9   |
| Zn <sub>0.5</sub> Cd <sub>0.5</sub> S-OLC                                                | 300 W Xe lamp (λ≥400 nm)             | Na <sub>2</sub> S-Na <sub>2</sub> SO <sub>3</sub> | 30                   | nanosheets    | 10.8                                                             | S10  |
| Zn <sub>0.7</sub> Cd <sub>0.3</sub> S/NiWO <sub>4</sub>                                  | 5 W LED (λ≥420 nm)                   | Na <sub>2</sub> S-Na <sub>2</sub> SO <sub>3</sub> | 10                   | nanosheets    | 15.95                                                            | S11  |
| AuPd/Cd <sub>0.5</sub> Zn <sub>0.5</sub> S                                               | 300 W Xe lamp (λ≥400 nm)             | Na <sub>2</sub> S-Na <sub>2</sub> SO <sub>3</sub> | 50                   | spheres       | 3.65                                                             | S12  |
| Bi <sup>3+</sup> -doped Cd <sub>0.5</sub> Zn <sub>0.5</sub> S                            | high-pressure mercury lamp(λ≥420 nm) | Na <sub>2</sub> S-Na <sub>2</sub> SO <sub>3</sub> | 100                  | particles     | 0.56                                                             | S13  |
| MoS <sub>2</sub> /Cd <sub>0.8</sub> Zn <sub>0.2</sub> S                                  | 300 W Xe lamp (λ≥400 nm)             | Na <sub>2</sub> S-Na <sub>2</sub> SO <sub>3</sub> | 35                   | urchin-like   | 1.3                                                              | S14  |
| Zn <sub>0.1</sub> Cd <sub>0.9</sub> S/NiS                                                | 300 W Xe lamp (λ > 300 nm)           | glucose                                           | 10                   | nanorods      | 12.7                                                             | S15  |
| NiS modified Mn <sub>x</sub> Cd <sub>1-x</sub> S                                         | 300 W Xe lamp (λ≥420 nm)             | Na <sub>2</sub> S-Na <sub>2</sub> SO <sub>3</sub> | 50                   | nanoparticles | 8.39                                                             | S16  |
| 1wt%Pt/Ni <sub>0.01</sub> Mn <sub>0.56</sub> Cd <sub>0.43</sub> S                        | 300 W Xe lamp (λ≥400 nm)             | Na <sub>2</sub> S-Na <sub>2</sub> SO <sub>3</sub> | 200                  | nanoparticles | 0.33                                                             | S17  |
| Cu <sub>2</sub> S/CdS                                                                    | 300 W Xe lamp (λ≥420 nm)             | Na <sub>2</sub> S-Na <sub>2</sub> SO <sub>3</sub> | 200                  | polyhedrons   | 2.0                                                              | S18  |

| Photocatalyst                                                                        | Light source               | Sacrificial reagent                               | Catalyst dosage (mg) | morphology   | H <sub>2</sub> evolution (mmol g <sup>-1</sup> h <sup>-1</sup> ) | Ref. |
|--------------------------------------------------------------------------------------|----------------------------|---------------------------------------------------|----------------------|--------------|------------------------------------------------------------------|------|
| CdS/NiTiO <sub>3</sub> /CoS                                                          | 300 W Xe lamp (λ ≥ 420 nm) | lactic acid                                       | 50                   | nanoflakes   | 6.24                                                             | S19  |
| NiS/TiO <sub>2</sub>                                                                 | 300 W Xe lamp (λ > 300 nm) | methanol                                          | 50                   | nanosheets   | 0.31                                                             | S20  |
| Co(OH) <sub>2</sub> /CdS                                                             | 500 W Xe lamp              | ethanol                                           | 100                  | nanorods     | 0.061                                                            | S21  |
| NiS/CDs/CdS                                                                          | 350 W Xe lamp (λ ≥ 420 nm) | Na <sub>2</sub> S-Na <sub>2</sub> SO <sub>3</sub> | 100                  | spheres      | 1.44                                                             | S22  |
| Cd <sub>0.5</sub> Zn <sub>0.5</sub> S/BiVO <sub>4</sub>                              | 300 W Xe lamp (λ ≥ 420 nm) | Na <sub>2</sub> S-Na <sub>2</sub> SO <sub>3</sub> | certain amounts      | spheres      | 2.35                                                             | S23  |
| Cd <sub>0.5</sub> Zn <sub>0.5</sub> S                                                | 300 W Xe lamp (λ ≥ 420 nm) | AgNO <sub>3</sub> , benzoquinone and EDTA-2Na     | 50                   | dendritic    | 0.15                                                             | S24  |
| Mo doped Cd <sub>0.5</sub> Zn <sub>0.5</sub> S                                       | 300 W Xe lamp (λ ≥ 420 nm) | lactic acid                                       | 20                   | nanorods     | 11.32                                                            | S25  |
| NiS <sub>x</sub> /Cd <sub>0.5</sub> Zn <sub>0.5</sub> S                              | 300 W Xe lamp (λ ≥ 430 nm) | Na <sub>2</sub> S-Na <sub>2</sub> SO <sub>3</sub> | 100                  | nanorods     | 4.46                                                             | S26  |
| SiO <sub>2</sub> /Ni <sub>2</sub> P/rGO/Cd <sub>0.5</sub> Zn <sub>0.5</sub> S        | 300 W Xe lamp (λ ≥ 420 nm) | Na <sub>2</sub> S-Na <sub>2</sub> SO <sub>3</sub> | 30                   | yolk-shell   | 11.65                                                            | S27  |
| PtPd decorated Zn <sub>0.5</sub> Cd <sub>0.5</sub> S                                 | 300 W Xe lamp (λ ≥ 400 nm) | Na <sub>2</sub> S-Na <sub>2</sub> SO <sub>3</sub> | 50                   | nanorods     | 9.689                                                            | S28  |
| Cd <sub>0.5</sub> Zn <sub>0.5</sub> S@Bi <sub>2</sub> Fe <sub>4</sub> O <sub>9</sub> | 300 W Xe lamp (λ ≥ 420 nm) | Na <sub>2</sub> S-Na <sub>2</sub> SO <sub>3</sub> | 20                   | quantum dots | 0.8                                                              | S 29 |
| Co <sub>0.85</sub> Se/Cd <sub>0.5</sub> Zn <sub>0.5</sub> S                          | 300 W Xe lamp (λ ≥ 420 nm) | Na <sub>2</sub> S-Na <sub>2</sub> SO <sub>3</sub> | 100                  | nanorods     | 0.76                                                             | S30  |

| Photocatalyst                                                       | Light source             | Sacrificial reagent                               | Catalyst dosage (mg) | morphology       | H <sub>2</sub> evolution (mmol g <sup>-1</sup> h <sup>-1</sup> ) | Ref.             |
|---------------------------------------------------------------------|--------------------------|---------------------------------------------------|----------------------|------------------|------------------------------------------------------------------|------------------|
| Cd <sub>0.5</sub> Zn <sub>0.5</sub> S@C <sub>3</sub> N <sub>4</sub> | 300 W Xe lamp (λ≥420 nm) | Na <sub>2</sub> S-Na <sub>2</sub> SO <sub>3</sub> | 20                   | quantum dots     | 33.4                                                             | S31              |
| p-CuS/n-CdS                                                         | 300 W Xe lamp (λ≥420 nm) | Na <sub>2</sub> S-Na <sub>2</sub> SO <sub>3</sub> | 20                   | nanoparticles    | 7                                                                | S32              |
| CoO <sub>x</sub> -loaded TiO <sub>2</sub> /CdS                      | 300 W Xe lamp (λ≥400 nm) | Na <sub>2</sub> S-Na <sub>2</sub> SO <sub>3</sub> | 10                   | nanoparticles    | 0.66                                                             | S33              |
| CuS/ZnS                                                             | 300 W Xe lamp (λ≥400 nm) | Na <sub>2</sub> S-Na <sub>2</sub> SO <sub>3</sub> | 50                   | hexagonal plates | 1.23                                                             | S34              |
| Ni-doped ZnS                                                        | 300 W Xe lamp (λ≥420 nm) | Na <sub>2</sub> S-K <sub>2</sub> SO <sub>3</sub>  | 1000                 | particles        | 0.28                                                             | S35              |
| Cu-doped ZnIn <sub>2</sub> S <sub>4</sub>                           | 300 W Xe lamp (λ≥430 nm) | Na <sub>2</sub> S-Na <sub>2</sub> SO <sub>3</sub> | 200                  | microspheres     | 0.76                                                             | S36              |
| MoS <sub>2</sub> -graphene/ZnIn <sub>2</sub> S <sub>4</sub>         | 300 W Xe lamp (λ≥420 nm) | Na <sub>2</sub> S-Na <sub>2</sub> SO <sub>3</sub> | 50                   | microspheres     | 4.17                                                             | S37              |
| CdIn <sub>2</sub> S <sub>4</sub>                                    | 450 W Xe lamp (λ≥420 nm) | methanol                                          | 50                   | nanotubes        | 6.96                                                             | S38              |
| Zn <sub>0.5</sub> Cd <sub>0.5</sub> S/NiS                           | 300 W Xe lamp (λ≥420 nm) | Na <sub>2</sub> S-Na <sub>2</sub> SO <sub>3</sub> | 50                   | nanosheets       | <b>9.98</b>                                                      | <b>This work</b> |

- S1. J. Wang, B. Li, J. Chen, N. Li, J. Zheng, J. Zhao and Z. Zhu, *Applied Surface Science*, 2012, **259**, 118-123.
- S2. Y. Su, Z. Zhang, H. Liu and Y. Wang, *Applied Catalysis B: Environmental*, 2017, **200**, 448-457.
- S3. Y. Tang, D. Zhang, X. Pu, B. Ge, Y. Li and Y. Huang, *Journal of the Taiwan Institute of Chemical Engineers*, 2019, **96**, 487-495.
- S4. D. V. Markovskaya, S. V. Cherepanova, A. A. Saraev, E. Y. Gerasimov and E. A. Kozlova, *Chem. Eng. J.*, 2015, **262**, 146-155.
- S5. C.-C. Wang, J.-W. Chang and S.-Y. Lu, *Catalysis Science & Technology*, 2017, **7**, 1305-1314.
- S6. Y. Liu, H. Ren, H. Lv, Z. Gong and Y. Cao, *Applied Surface Science*, 2019, **484**, 1061-1069.
- S7. L. Zhang, T. Jiang, S. Li, Y. Lu, L. Wang, X. Zhang, D. Wang and T. Xie, *Dalton transactions*, 2013, **42**,



- 12998-13003.
- S8. Y. Tang, X. Li, D. Zhang, X. Pu, B. Ge and Y. Huang, *Materials Research Bulletin*, 2019, **110**, 214-222.
- S9. Z. Shao, T. Zeng, Y. He, D. Zhang and X. Pu, *Chem. Eng. J.*, 2019, **359**, 485-495.
- S10. T. Liu, Q. Li, S. Qiu, Q. Wang, X. Peng, H. Yuan and X. Wang, *Applied Surface Science*, 2020, **525**, 146586.
- S11. Y. Liu, G. Wang, Y. Li and Z. Jin, *Journal of Colloid and Interface Science*, 2019, **554**, 113-124.
- S12. L. Wu, J. Gong, L. Ge, C. Han, S. Fang, Y. Xin, Y. Li and Y. Lu, *International Journal of Hydrogen Energy*, 2016, **41**, 14704-14712.
- S13. S. Peng, R. An, Y. Li, G. Lu and S. Li, *International Journal of Hydrogen Energy*, 2012, **37**, 1366-1374.
- S14. A. Liu, P. Ling, G. Yu, H. Jin, S. Wang and J. Wang, *International Journal of Hydrogen Energy*, 2017, **42**, 18824-18831.
- S15. Y.-S. Shen, F.-Y. Bai, K. Wei, X.-L. Wang, J. Chen, Z.-Y. Jiang, J. Liu, Z.-Y. Hu, L.-H. Chen, Y. Li and B.-L. Su, *Applied Surface Science*, 2023, **626**, 157237.
- S16. X. Liu, X. Liang, P. Wang, B. Huang, X. Qin, X. Zhang and Y. Dai, *Applied Catalysis B: Environmental*, 2017, **203**, 282-288.
- S17. M. Xiong, Y. Qin, B. Chai, J. Yan, G. Fan, F. Xu, C. Wang and G. Song, *Chemical Engineering Journal*, 2022, **428**, 131069.
- S18. Y. Chen, Z. Qin, X. Wang, X. Guo and L. Guo, *RSC Advances*, 2015, **5**, 18159-18166.
- S19. Z. Wang, J. Peng, X. Feng, Z. Ding and Z. Li, *Catalysis Science & Technology*, 2017, **7**, 2524-2530.
- S20. Y. Xin, Y. Lu, C. Han, L. Ge, P. Qiu, Y. Li and S. Fang, *Materials Research Bulletin*, 2017, **87**, 123-129.
- S21. X. Zhou, J. Jin, X. Zhu, J. Huang, J. Yu, W.-Y. Wong and W.-K. Wong, *Journal of Materials Chemistry A*, 2016, **4**, 5282-5287.
- S22. R.-B. Wei, Z.-L. Huang, G.-H. Gu, Z. Wang, L. Zeng, Y. Chen and Z.-Q. Liu, *Applied Catalysis B: Environmental*, 2018, **231**, 101-107.
- S23. C. Zeng, Y. Hu, T. Zhang, F. Dong, Y. Zhang and H. Huang, *Journal of Materials Chemistry A*, 2018, **6**, 16932-16942.
- S24. S. Lin, Q. Wang, H. Huang and Y. Zhang, *Small*, 2022, **18**.
- S25. W. Huang, C. Su, C. Zhu, T. Bo, S. Zuo, W. Zhou, Y. Ren, Y. Zhang, J. Zhang, M. Rueping and H. Zhang, *Angew. Chem. Int. Ed.*, 2023, **62**.
- S26. M. Liu, Y. Chen, J. Su, J. Shi, X. Wang and L. Guo, *Nature Energy*, 2016, **1**.
- S27. P. Zhang, C. Xue, Y. Li, S. Guo, X. Zhang, P. Zhang and G. Shao, *Chemical Engineering Journal*, 2021, **404**, 126497.
- S28. L. Zhang, F. Zhang, H. Xue, J. Gao, Y. Peng, W. Song and L. Ge, *Chinese Journal of Catalysis*, 2021, **42**, 1677-1688.
- S29. H. Hua, F. Feng, M. Du, Y. Ma, Y. Pu, J. Zhang and X. a. Li, *Applied Surface Science*, 2021, **541**, 148428.
- S30. X. Sun and H. Du, *ACS Sustainable Chemistry & Engineering*, 2019, **7**, 16320-16328.
- S31. L. Yao, D. Wei, Y. Ni, D. Yan and C. Hu, *Nano Energy*, 2016, **26**, 248-256.
- S32. I. Vamvasakis, A. Trapali, J. Miao, B. Liu and G. S. Armatas, *Inorganic Chemistry Frontiers*, 2017, **4**, 433-441.

- S33. Z. Yan, H. Wu, A. Han, X. Yu and P. Du, *International Journal of Hydrogen Energy*, 2014, **39**, 13353-13360.
- S34. L. Wang, H. Chen, L. Xiao and J. Huang, *Powder Technol.*, 2016, **288**, 103-108.
- S35. A. Kudo and M. Sekizawa, *Chemical Communications*, 2000, DOI: 10.1039/b003297m, 1371-1372.
- S36. .
- S37. Y.-J. Yuan, J.-R. Tu, Z.-J. Ye, D.-Q. Chen, B. Hu, Y.-W. Huang, T.-T. Chen, D.-P. Cao, Z.-T. Yu and Z.-G. Zou, *Applied Catalysis B: Environmental*, 2016, **188**, 13-22.
- S38. B. B. Kale, J. O. Baeg, S. M. Lee, H. Chang, S. J. Moon and C. W. Lee, *Adv. Funct. Mater.*, 2006, **16**, 1349-1354.
